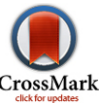

## Correction

# Correction: Biosynthesis of Firefly Luciferin in Adult Lantern: Decarboxylation of L-Cysteine is a Key Step for Benzothiazole Ring Formation in Firefly Luciferin Synthesis

The *PLOS ONE* Staff

### Notice of Republication

This article was republished on March 19, 2014, to replace an incorrectly published version. The publisher apologizes for these errors.

### Supporting Information

**File S1.** Originally published, uncorrected article.

**File S2.** Republished corrected article.

### Reference

1. Oba Y, Yoshida N, Kanie S, Ojika M, Inouye S (2013) Biosynthesis of Firefly Luciferin in Adult Lantern: Decarboxylation of L-Cysteine is a Key Step for Benzothiazole Ring Formation in Firefly Luciferin Synthesis. *PLoS ONE* 8(12): e84023. doi:10.1371/journal.pone.0084023

**Citation:** The *PLOS ONE* Staff (2014) Correction: Biosynthesis of Firefly Luciferin in Adult Lantern: Decarboxylation of L-Cysteine is a Key Step for Benzothiazole Ring Formation in Firefly Luciferin Synthesis. *PLoS ONE* 9(4): e95063. doi:10.1371/journal.pone.0095063

**Published:** April 7, 2014

**Copyright:** © 2014 The *PLOS ONE* Staff. This is an open-access article distributed under the terms of the Creative Commons Attribution License, which permits unrestricted use, distribution, and reproduction in any medium, provided the original author and source are credited.
